# Supplementary material for: Elevated glucose is associated with hemorrhagic transformation after mechanical thrombectomy in acute ischemic stroke patients with severe pretreatment hypoperfusion
Source: PubMed Central journal article supplement (PMC7324383; doi:10.1038/s41598-020-67448-x), 2020-06-29
Supplement: 41598_2020_67448_MOESM1_ESM.pdf [file 41598_2020_67448_MOESM1_ESM.pdf]

## **Supplementary Information**

**Title:** Elevated glucose is associated with hemorrhagic transformation after mechanical thrombectomy in patients with severe pretreatment hypoperfusion.

**Authors:** Carlos Laredo,<sup>1</sup> Arturo Renú,<sup>1</sup> Laura Llull,<sup>1</sup> Raúl Tudela,<sup>2</sup> Antonio Lopez-Rueda,<sup>3</sup> Xabier Urra,<sup>1</sup> Napoleón G Macías,<sup>3</sup> Salvatore Rudilosso,<sup>1</sup> Víctor Obach,<sup>1</sup> Sergio Amaro\*,<sup>1</sup> Ángel Chamorro\*.<sup>1</sup>

### **Affiliations**

<sup>1</sup> Comprehensive Stroke Center, Department of Neuroscience, Hospital Clinic, University of Barcelona and August Pi i Sunyer Biomedical Research Institute (IDIBAPS), Barcelona, Spain.

<sup>2</sup> CIBER de Bioingeniería, Biomateriales y Nanomedicina (CIBER-BBN), Group of Biomedical Imaging of the University of Barcelona, Barcelona, Spain.

<sup>3</sup> Radiology Department, Hospital Clinic, Barcelona, Spain.

**Corresponding authors\*:** Sergio Amaro and Angel Chamorro; Hospital Clinic, Villarroel 170, 08036 Barcelona, Spain. Email: samaro@clinic.cat and achamorro@clinic.cat; Tel.: +34932275414; fax: +34932275783.

## **Supplementary methods**

### **CTP imaging and follow-up MRI parameters**

Patients were scanned using a SIEMENS Somatom Definition Flash 128-section dual-source multidetector scanner (Siemens Healthcare, Erlangen, Germany), with a 98mm z-coverage and a total acquisition time of 60s (31 time points). The imaging protocol included a baseline multimodal whole-brain CT scan, which included a Non-Contrast CT (NCCT) (140Kv, 127mAs, FoV 225mm, matrix 512x512, slice thickness 5mm), a CT angiography (120Kv, 663mAs, FoV 261mm, matrix 512x512, slice thickness 0,6mm), and a CTP. For CTP acquisition, a total of fifty milliliters of nonionic iodinated contrast was administered intravenously at 5 mL/s by using a power injector, followed by a saline flush of 20ml at an injection rate of 2ml/s. CTP imaging parameters were 80 kV(peak), 250 mAs, 1.5-second rotation, FoV 18mm, matrix 512x512, and 2-mm thickness (49 slices in total). The follow-up MRI included diffusion-weighted images (DWI, parameters: Repetition time (TR)/echo time (TE) 10800/89ms, matrix 192x192, Field of View (FoV) 240mm, slice thickness 3mm, directions x,y,z, b-values: 0 and 1000 mm/s<sup>2</sup>) and Gradient-Echo T2\*-weighted (GRE: TR/TE 764/26 ms; matrix 384x512 ; FoV 240 mm ; slice thickness 5 mm) sequences.

## Supplementary Figure S1

### Flow chart of the study.

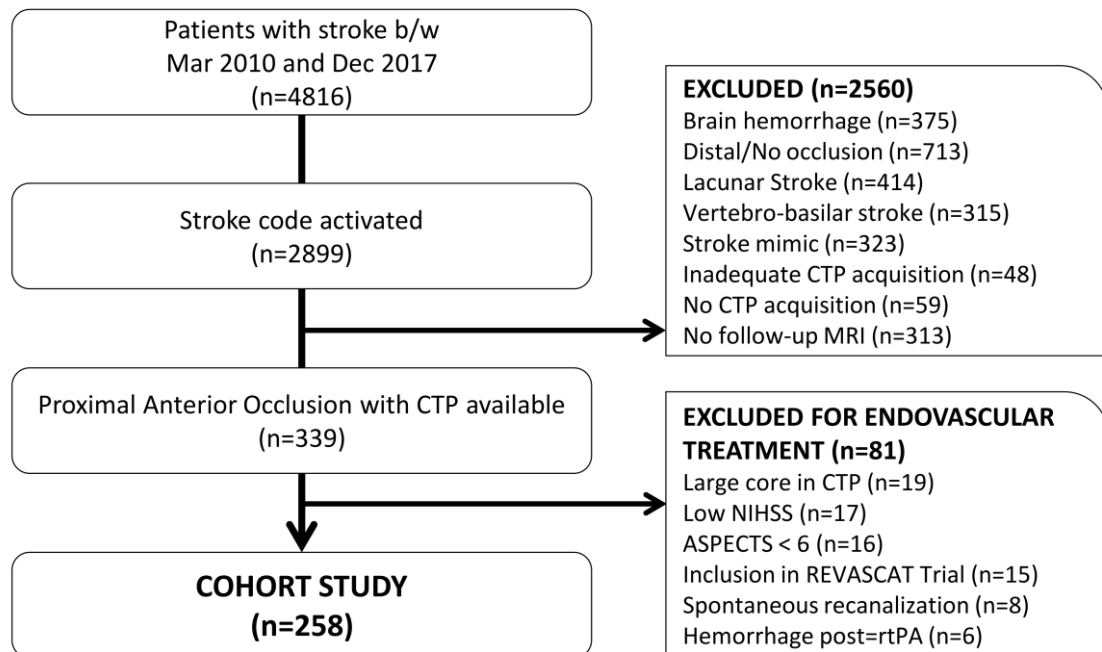

**Supplementary Figure S2**

**Distribution of pretreatment glucose concentration and Very Low CBV regions.**

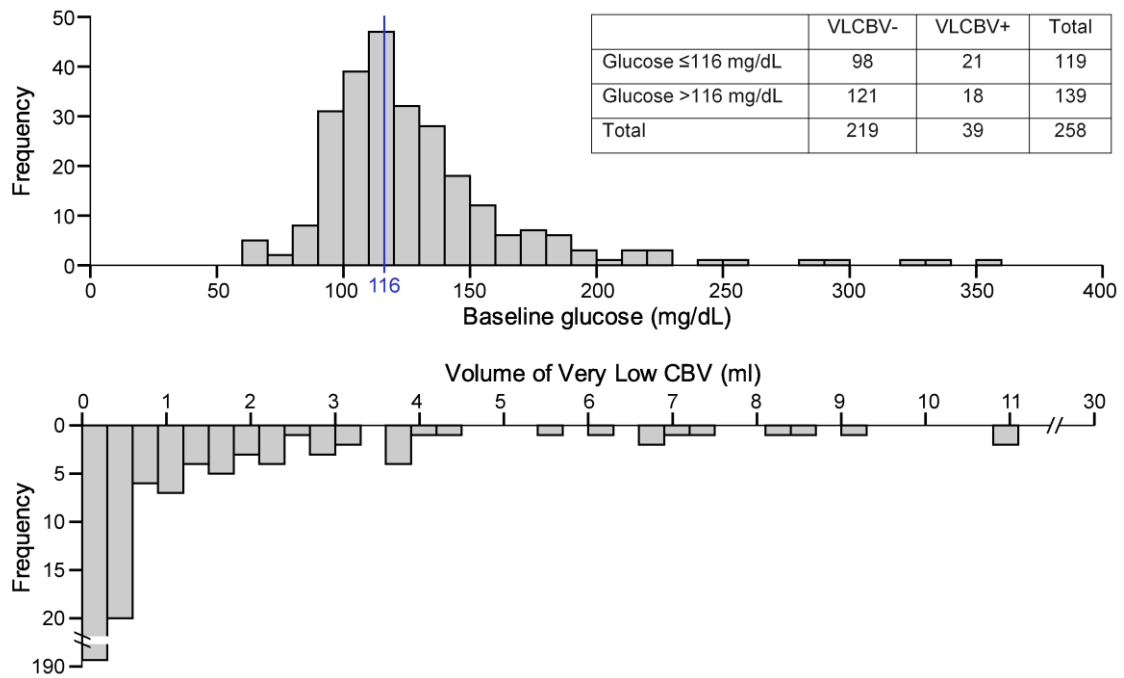

**Figure legend:** Histograms showing the distribution of pretreatment glucose levels, the volume of regions with very low cerebral blood volume (VLCBV) and the number of patients in categories defined by the presence of VLCBV regions and glucose levels higher or lower than 116 mg/dL.

### Supplementary Table 1

**Demographics, baseline and procedure related variables according to the presence of Very Low Cerebral Blood Volume regions.**

|                                               | <b>VLCBV -<br/>N=219</b> | <b>VLCBV +<br/>N=39</b> | <b>p</b> |
|-----------------------------------------------|--------------------------|-------------------------|----------|
| Age (years), median (IQR)                     | 72 (61-80)               | 67 (56-81)              | 0.216    |
| Males, n (%)                                  | 102 (47)                 | 30 (77)                 | <0.001   |
| Hypertension, n (%)                           | 123 (56)                 | 24 (62)                 | 0.532    |
| Diabetes, n (%)                               | 34 (16)                  | 2 (5)                   | 0.084    |
| Dyslipidemia, n (%)                           | 83 (38)                  | 15 (39)                 | 0.947    |
| Atrial Fibrillation, n (%)                    | 62 (28)                  | 13 (33)                 | 0.524    |
| Previous Antithrombotic treatment, n (%)      | 85 (39)                  | 19 (49)                 | 0.245    |
| Baseline SBP (mmHg), median (IQR)             | 142 (125-160)            | 135 (125-150)           | 0.178    |
| Glucose (mg/dL), median (IQR)                 | 120 (106-142)            | 116 (93-134)            | 0.088    |
| NIHSS at admission, median (IQR)              | 16 (10-20)               | 18 (15-21)              | 0.049    |
| Ischemic core on CTP (mL), median (IQR)       | 15 (7-27)                | 54 (43-72)              | <0.001   |
| Hypoperfused tissue on CTP (mL), median (IQR) | 129 (87-169)             | 203 (153-234)           | <0.001   |
| Good collaterals, n (%)                       | 166 (76)                 | 19 (49)                 | 0.001    |
| Alteplase + MT, n (%)                         | 105 (48)                 | 12 (31)                 | 0.047    |
| Recanalization (yes), n (%)                   | 174 (80)                 | 30 (77)                 | 0.721    |
| Time to recanalization (min), median (IQR)    | 291 (205-395)            | 288 (210-405)           | 0.851    |
| Recanalization groups                         |                          |                         | 0.922    |
| Recanalization <4.5h, n (%)                   | 78 (36)                  | 14 (36)                 |          |
| Recanalization >4.5h, n (%)                   | 96 (44)                  | 16 (41)                 |          |
| No rec, n (%)                                 | 45 (21)                  | 9 (23)                  |          |
| Time to MRI (hours), md (IQR)                 | 40 (26-67)               | 41 (27-70)              | 0.971    |
| Cardioembolic origin, n (%)                   | 107 (49)                 | 23 (59)                 | 0.244    |
| Location of the occlusion                     |                          |                         | 0.336    |
| Tandem occlusions, n (%)                      | 31 (14)                  | 9 (23)                  |          |
| ICA-T or M1, n (%)                            | 171 (78)                 | 28 (72)                 |          |
| M2, n (%)                                     | 17 (8)                   | 2 (5)                   |          |

ASPECTS: Alberta Stroke Program Early CT Score; CTP: computed tomographic perfusion; ET: endovascular therapy; ICA-T: internal carotid artery; MT: Mechanical Thrombectomy; NIHSS: National Institutes of Health Stroke Scale; SBP: systolic blood pressure; VLCBV: very low cerebral blood volume.

## Supplementary Table 2

Demographics, baseline and procedure related variables according to the occurrence of parenchymal hematoma in patients with Very Low Cerebral Blood Volume regions.

|                                               | No PH<br>N=26 | PH<br>N=13    | p     |
|-----------------------------------------------|---------------|---------------|-------|
| Age (years), median (IQR)                     | 68 (53-81)    | 63 (57-76)    | 0.918 |
| Males, n (%)                                  | 20 (77)       | 10 (77)       | 1.000 |
| Hypertension, n (%)                           | 12 (46)       | 3 (23)        | 0.163 |
| Diabetes, n (%)                               | 1 (4)         | 1 (8)         | 1.000 |
| Dyslipidemia, n (%)                           | 10 (39)       | 5 (39)        | 1.000 |
| Atrial Fibrillation, n (%)                    | 7 (27)        | 6 (46)        | 0.290 |
| Previous Antithrombotic treatment, n (%)      | 10 (39)       | 9 (69)        | 0.070 |
| Baseline SBP (mmHg), median (IQR)             | 135 (125-149) | 135 (125-155) | 0.965 |
| Glucose (mg/dL), median (IQR)                 | 109 (91-127)  | 133 (116-150) | 0.023 |
| NIHSS at admission, median (IQR)              | 18 (14-19)    | 21 (19-23)    | 0.010 |
| Ischemic core on CTP (mL), median (IQR)       | 57 (48-72)    | 53 (32-65)    | 0.308 |
| Hypoperfused tissue on CTP (mL), median (IQR) | 204 (164-229) | 198 (143-264) | 0.872 |
| VLCBV (mL), median (IQR)                      | 3.8 (2.3-7.3) | 3.0 (2.2-7.1) | 0.941 |
| Good collaterals, n (%)                       | 14 (54)       | 5 (39)        | 0.365 |
| Alteplase + MT, n (%)                         | 19 (73)       | 8 (62)        | 0.486 |
| Recanalization (yes), n (%)                   | 20 (77)       | 10 (77)       | 1.000 |
| Time to recanalization (min), median (IQR)    | 270 (216-373) | 360 (290-435) | 0.087 |
| Recanalization groups                         |               |               | 0.117 |
| Recanalization <4.5h, n (%)                   | 12 (46)       | 2 (15)        |       |
| Recanalization >4.5h, n (%)                   | 8 (31)        | 8 (62)        |       |
| No rec, n (%)                                 | 6 (23)        | 3 (23)        |       |
| Time to MRI (hours), md (IQR)                 | 41 (28-70)    | 41 (26-75)    | 0.987 |
| Cardioembolic origin, n (%)                   | 15 (58)       | 8 (62)        | 0.818 |
| Location of the occlusion                     |               |               | 0.663 |
| Tandem occlusions, n (%)                      | 7 (27)        | 2 (15)        |       |
| ICA-T or M1, n (%)                            | 18 (69)       | 10 (77)       |       |
| M2, n (%)                                     | 1 (4)         | 1 (8)         |       |

ASPECTS: Alberta Stroke Program Early CT Score; CTP: computed tomographic perfusion; ET: endovascular therapy; ICA-T: internal carotid artery; MT: Mechanical Thrombectomy; NIHSS: National Institutes of Health Stroke Scale; SBP: systolic blood pressure; VLCBV: very low cerebral blood volume.

**Supplementary Table 3**

**Adjusted multivariate models for the prediction of parenchymal hematoma in the whole population and in subgroups defined by the presence of VLCBV regions.**

|                                                                | <b>Whole population</b>      | <b>VLCBV -</b>              | <b>VLCBV +</b>                |
|----------------------------------------------------------------|------------------------------|-----------------------------|-------------------------------|
|                                                                | OR 95%CI<br>p value          | OR 95%CI<br>p value         | OR 95%CI<br>p value           |
| <b>Pretreatment glucose (per IQR)</b>                          | 0.97 (0.71-1.32)<br>p=0.834  | 0.80 (0.55-1.16)<br>p=0.244 | 3.15 (1.08-9.19)<br>p=0.036   |
| <b>Baseline NIHSS (per IQR)</b>                                | 1.42 (1.02-1.96)<br>p=0.037  | 1.18 (0.81-1.70)<br>p=0.394 | 2.23 (0.71-7.29)<br>p=0.165   |
| <b>Recanalization &gt;4'5h from stroke onset (vs &lt;4'5h)</b> | 5.24 (2.03-13.51)<br>p=0.001 | 1.18 (0.81-1.70)<br>p=0.394 | 18.0 (1.28-252.70)<br>p=0.032 |
| <b>No recanalization (vs &lt;4'5h)</b>                         | 2.51 (0.81-7.80)<br>p=0.112  | 2.38 (0.60-9.47)<br>p=0.220 | 2.51 (0.16-40.10)<br>p=0.516  |
| <b>Cardioembolic etiology (vs no)</b>                          | 2.12 (1.04-4.32)<br>p=0.039  | 2.10 (0.90-4.87)<br>p=0.085 | 0.94 (0.11-7.94)<br>p=0.951   |

VLCBV: Very low cerebral blood volume; NIHSS: National Institutes of Health Stroke Scale; PH: parenchymal hematoma. The Hosmer–Lemeshow test showed an adequate goodness-of-fit of the three models (p>0.05 for all).
